# Supplementary material for: Holey penta-hexagonal graphene: a promising anode material for Li-ion batteries
Source: Royal Society of Chemistry journal article supplement (doi:10.1039/d3cp06146a), 2024-01-01
Supplement: d3cp06146a1.pdf [file d3cp06146a1.pdf]

## Supporting information

### **Holey penta-hexagonal graphene: a promising anode material for Li-ion batteries**

Linguo Lu,<sup>1</sup> Raven Gallenstein,<sup>2</sup> Xinghui Liu,<sup>3,4</sup> Yi Lin,<sup>5</sup> Shiru Lin,<sup>2,\*</sup> Zhongfang Chen<sup>6,\*</sup>

<sup>1</sup> Department of Physics, University of Puerto Rico, Rio Piedras, San Juan, PR 00931, USA

<sup>2</sup> Division of Chemistry and Biochemistry, Texas Woman's University, Denton, TX 76204, USA

<sup>3</sup> Centre for Integrated Nanostructure Physics (CINAP), Institute of Basic Science (IBS), 2066 Seoburo, Jangan-Gu, Suwon 16419, Republic of Korea.

<sup>4</sup> Department of Chemistry, Sungkyunkwan University (SKKU), 2066 Seoburo, Jangan-Gu, Suwon 16419, Republic of Korea

<sup>5</sup> Advanced Materials and Processing Branch, NASA Langley Research Center, Hampton, Virginia 23681, USA

<sup>6</sup> Department of Chemistry, University of Puerto Rico, Rio Piedras, San Juan, PR 00931, USA

\* To whom correspondence should be addressed. Email: [slin6@twu.edu](mailto:slin6@twu.edu) (S. Lin), [zhongfang.chen1@upr.edu](mailto:zhongfang.chen1@upr.edu) (Z. Chen)

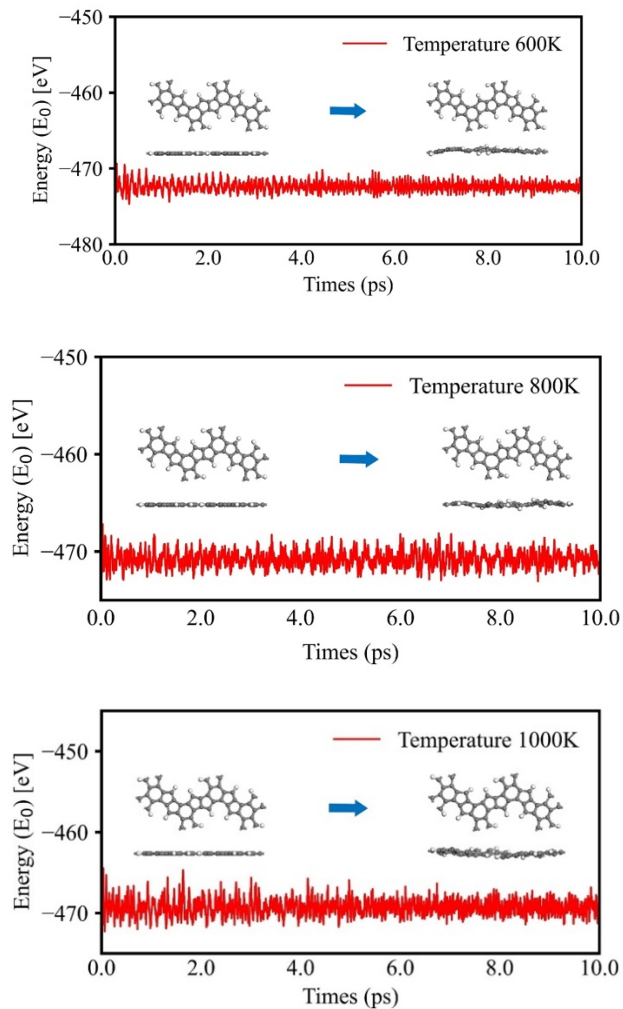

**Figure S1.** Initial and final structures of HPhG, accompanied by the energy evolution diagram, following a 10 ps AIMD simulation at 600 K, 800K, and 1000 K, respectively. The carbon and hydrogen atoms are denoted by grey and white, respectively.

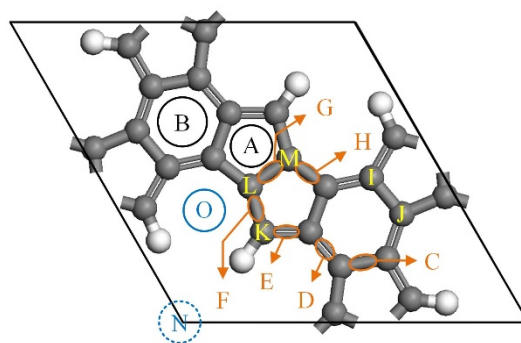

**Figure S2.** The possible Li adsorption sites in a unit cell of the holey penta-hexagonal graphene. The carbon and hydrogen atoms are denoted by grey and white, respectively.

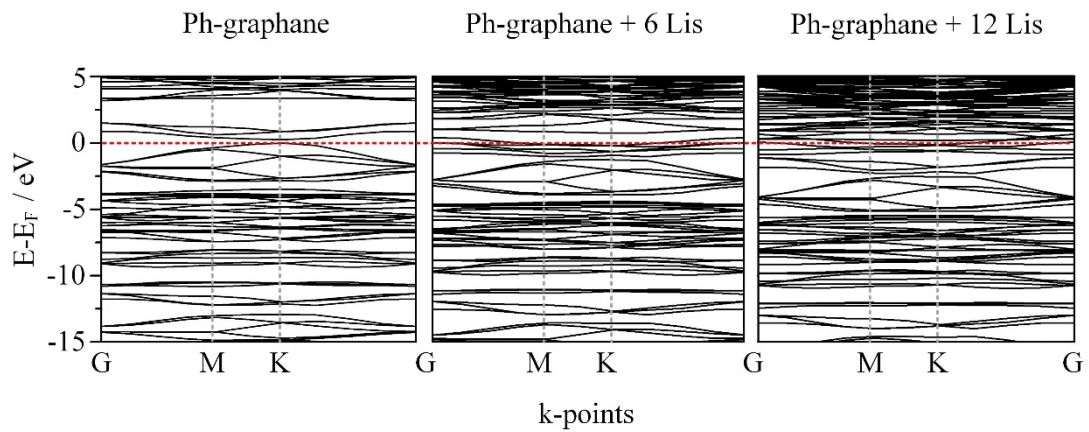

**Figure S3.** Band structures of holey penta-hexagonal graphene (HPhG) without and with adsorbed Li atoms (by PBE functional).

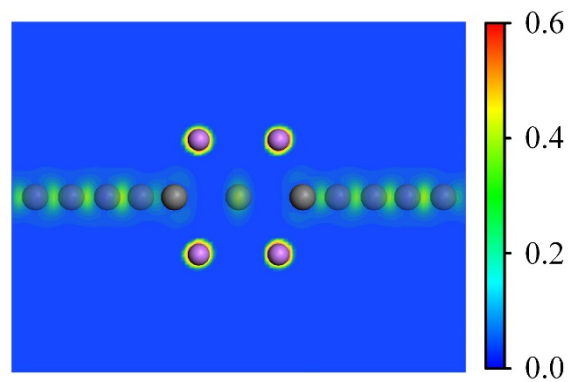

**Figure S4.** Electron location function (ELF) of holey penta-hexagonal graphene (HPhG) with 12 adsorbed Li atoms. The carbon, hydrogen and Lithium atoms are denoted by grey, white, and purple, respectively.
